# Supplementary material
Source: MDPI journal article supplement (https://www.mdpi.com/2227-9717/10/3/436)
Supplement: s1 [file s1]

**Supplementary Information**

**Comparative Metagenomics of Anaerobic Digester  
Communities Reveals Sulfidogenic and Methanogenic  
Microbial Subgroups in Conventional and Plug-Flow  
Residential Septic Tank Systems**

James Naphtali<sup>a</sup>, Alexander Chan<sup>a</sup>, Herb E. Schellhorn<sup>a\*</sup>

<sup>a</sup>Department of Biology, McMaster University, Hamilton, Ontario, Canada, L8S 4K1

Corresponding author: [schell@mcmaster.ca](mailto:schell@mcmaster.ca)

Department of Biology,

McMaster University

Bld 039, 1280 Main St W., Hamilton, ON, Canada

Tel: (905) 5259140 ext. 27130

**A.**

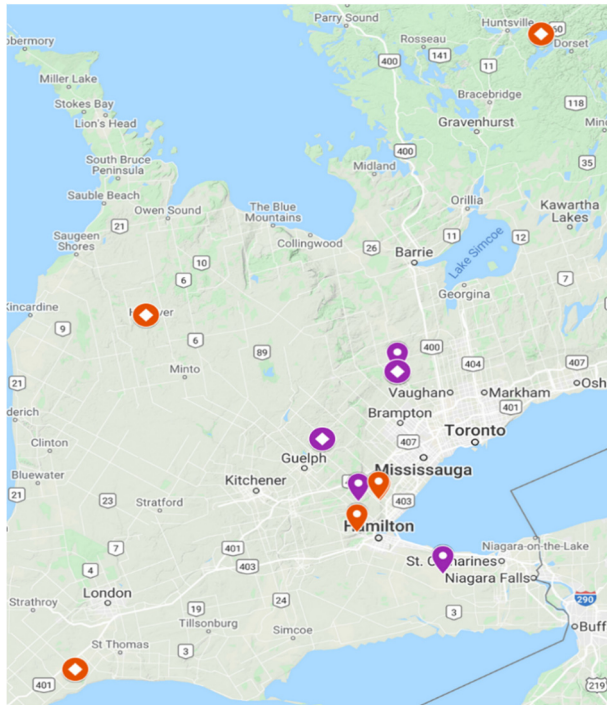

- ◆ Conventional Recirculating
- ◆ Conventional Single-Pass
- ◆ InnerTube Recirculating
- ◆ InnerTube Single-pass

**B.**

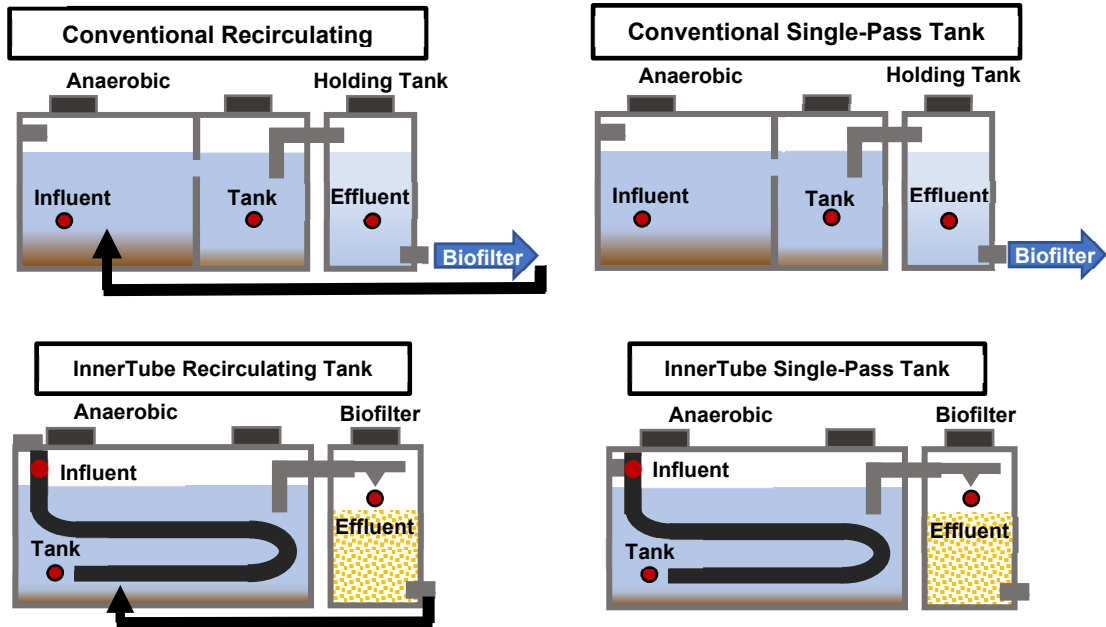

**Supplementary Figure S1.** a.) Sampling locations of the four digester types. b.) Four digester types examined with sampling points. Three replicate digesters were each sampled at Influent, Tank, and Effluent treatment points.

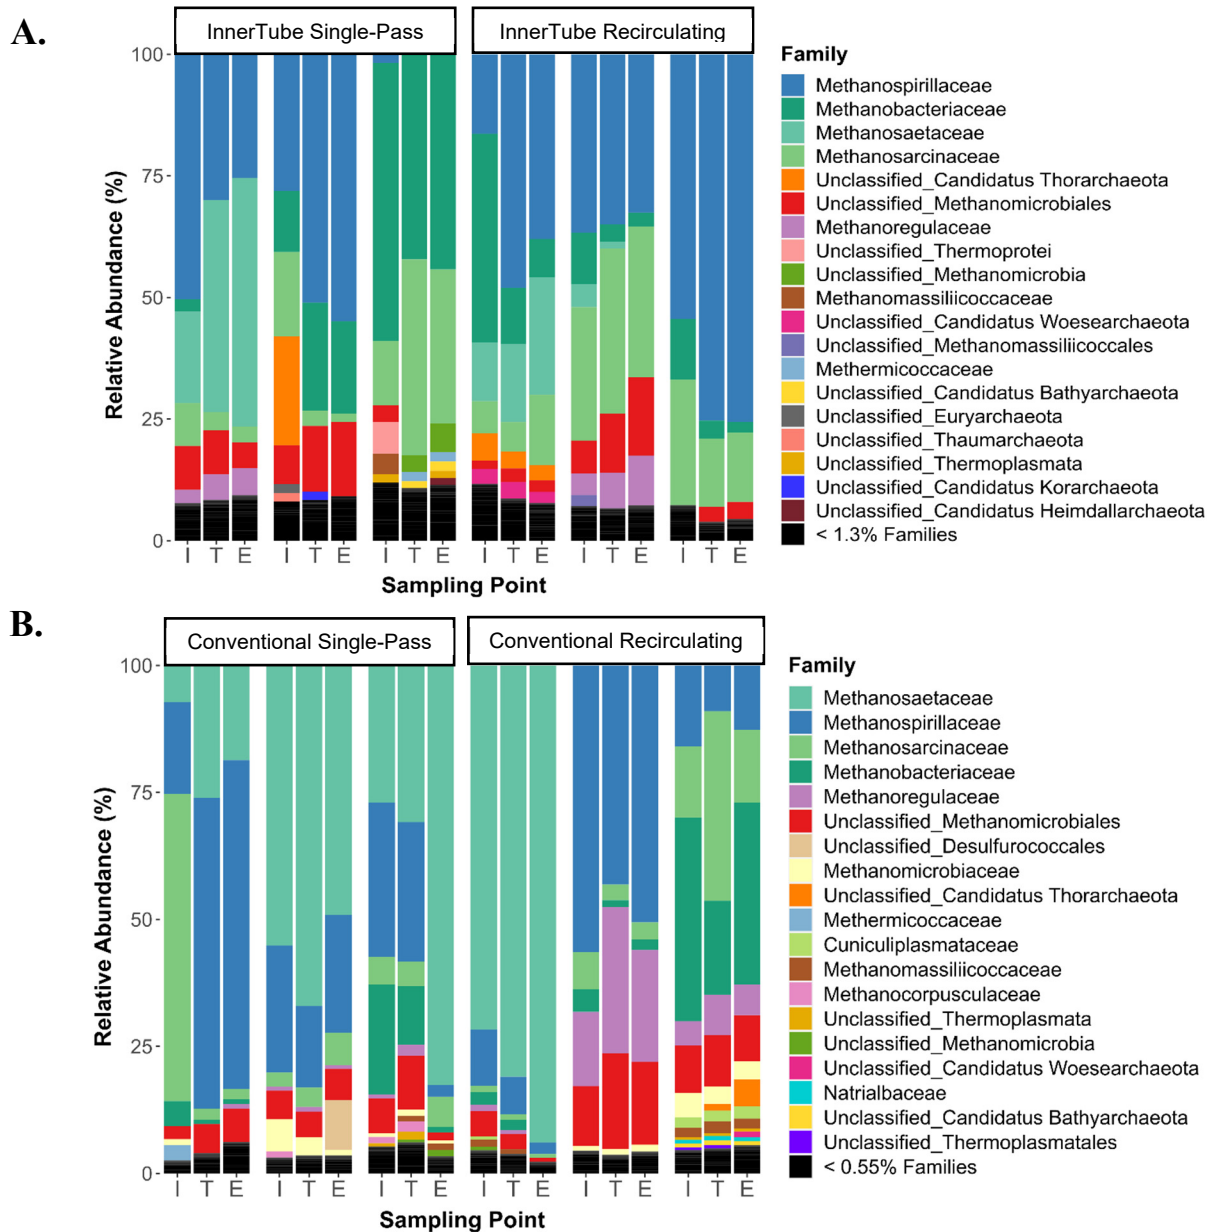

**Supplementary Figure S2.** Relative abundance bar graphs showing the top 20 families under Euryarchaeota for triplicate a.) InnerTube Single-pass, InnerTube Recirculating, b.) Conventional Single-Pass, and Convectional Recirculating across sampling points. I=Influent, T=Tank, E=Effluent. The lowest abundant phyla were aggregated into a cutoff percentage labeled in black.

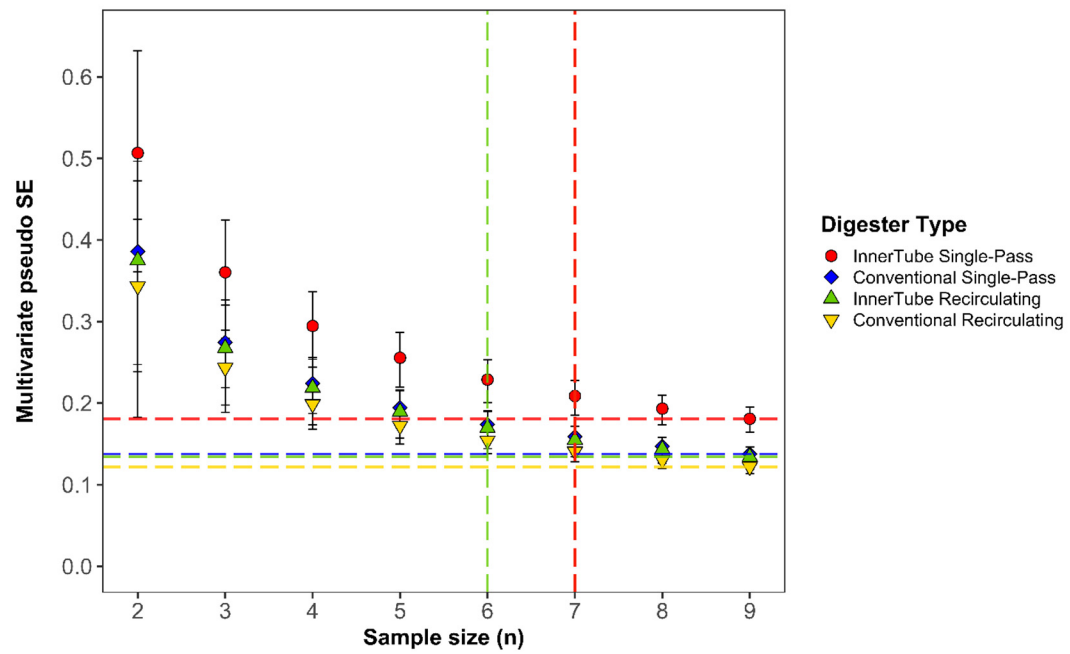

**Supplementary Figure S3.** Power curve of multivariate dissimilarity-based standard error estimates (multSE) of digester types vs. minimum required sample size. Scatterplot indicates the number of replicates (n=6 for InnerTube Recirculating, n=7 for all other digesters) at which there is no quantitative decrease in the standard error of Bray-Curtis dissimilarities within a given digester type.

**Supplementary Table S1.** a.) Permutational Analysis of Variance (PERMANOVA) and b.) permutation-based test of multivariate homogeneity of group dispersions (BETADISPER) of Bray-Curtis dissimilarities for species and functional genes of digester types and chemical parameters.

A.

|                                      | Taxonomic (Species) |                |                 |       |                            | Functional Genes |                |                 |       |                            |
|--------------------------------------|---------------------|----------------|-----------------|-------|----------------------------|------------------|----------------|-----------------|-------|----------------------------|
| Terms <sup>2</sup>                   | df                  | Sum of Squares | Pseudo <i>f</i> | R2    | <i>Adj. p</i> <sup>1</sup> | df               | Sum of Squares | Pseudo <i>f</i> | R2    | <i>Adj. p</i> <sup>1</sup> |
| Digester                             | 3                   | 0.810          | 2.496           | 0.210 | <b>0.001</b>               | 3                | 0.082          | 2.420           | 0.203 | <b>0.001</b>               |
| Sampling Point                       | 2                   | 0.182          | 0.839           | 0.047 | 0.782                      | 2                | 0.018          | 0.810           | 0.045 | 0.701                      |
| Digester:Sampling Point <sup>3</sup> | 6                   | 0.264          | 0.407           | 0.069 | 1.000                      | 6                | 0.033          | 0.488           | 0.082 | 1.000                      |
| Temperature                          | 1                   | 0.150          | 1.775           | 0.039 | <b>0.029</b>               | 1                | 0.042          | 4.860           | 0.103 | <b>0.001</b>               |
| pH                                   | 1                   | 0.199          | 2.365           | 0.052 | <b>0.003</b>               | 1                | 0.021          | 2.397           | 0.051 | <b>0.013</b>               |
| DO                                   | 1                   | 0.1134         | 1.346           | 0.029 | 0.164                      | 1                | 0.019          | 2.257           | 0.048 | <b>0.031</b>               |
| TSS                                  | 1                   | 0.126          | 1.489           | 0.033 | 0.098                      | 1                | 0.011          | 1.257           | 0.027 | 0.237                      |
| COD                                  | 1                   | 0.109          | 1.291           | 0.028 | 0.189                      | 1                | 0.008          | 0.892           | 0.019 | 0.520                      |
| NH3                                  | 1                   | 0.187          | 2.220           | 0.049 | <b>0.007</b>               | 1                | 0.009          | 1.087           | 0.023 | 0.352                      |
| TKN                                  | 1                   | 0.074          | 0.874           | 0.019 | 0.527                      | 1                | 0.007          | 0.760           | 0.016 | 0.633                      |

<sup>1</sup>:

## B.

|                     | Terms          | df | Sum of Squares | Pseudo <i>f</i> | Adj. <i>p</i> <sup>1</sup> |
|---------------------|----------------|----|----------------|-----------------|----------------------------|
| Taxonomic (Species) | Digester       | 3  | 0.077          | 16.577          | <b>0.001</b>               |
|                     | Sampling Point | 2  | 0.005          | 0.523           | 0.638                      |
| Functional Genes    | Digester       | 3  | 0.009          | 10.497          | <b>0.001</b>               |
|                     | Sampling Point | 2  | 0.001          | 0.539           | 0.606                      |

<sup>1</sup>: Significant terms are bolded ( $p < 0.05$ ).

<sup>2</sup>: Digester and Sampling Point comparisons were performed sequentially (Type I sequential Sum of Squares) while chemical parameter comparisons were performed marginally (Type III marginal Sum of Squares)

<sup>3</sup>: Colon represents the interaction between Digester and Sampling Point
